# Supplementary material for: Synthesis of α-MnO2nanowires modified by Co3O4nanoparticles as a high-performance catalyst for rechargeable Li–O2batteries
Source: Royal Society of Chemistry journal article supplement (doi:10.1039/c5cp06815k), 2015-11-27
Supplement: c5cp06815k1.pdf [file c5cp06815k1.pdf]

Supplementary Information For

## Synthesis of $\alpha$ -MnO<sub>2</sub> nanowires modified by Co<sub>3</sub>O<sub>4</sub> nanoparticles as a high-performance catalyst for rechargeable Li-O<sub>2</sub> batteries

Fan Wang,<sup>a</sup> Zhaoyin Wen<sup>\*a</sup>, Chen Shen<sup>a</sup>, Xiangwei Wu<sup>a</sup> and Jianjun Liu<sup>b</sup>

<sup>a</sup> CAS Key Laboratory of Materials for Energy Conversion, Shanghai Institute of Ceramics, Chinese Academy of Sciences, 1295 Ding Xi Road, Shanghai 200050, People's Republic of China.

<sup>b</sup> State Key Laboratory of High Performance Ceramics and Superfine Microstructures, Shanghai Institute of Ceramics, Chinese Academy of Sciences, Shanghai 200050, People's Republic of China.

\* Corresponding author. Fax: +86-21-52413903 Tel: +86-21-52411704 E-mail:

[zywen@mail.sic.ac.cn](mailto:zywen@mail.sic.ac.cn)

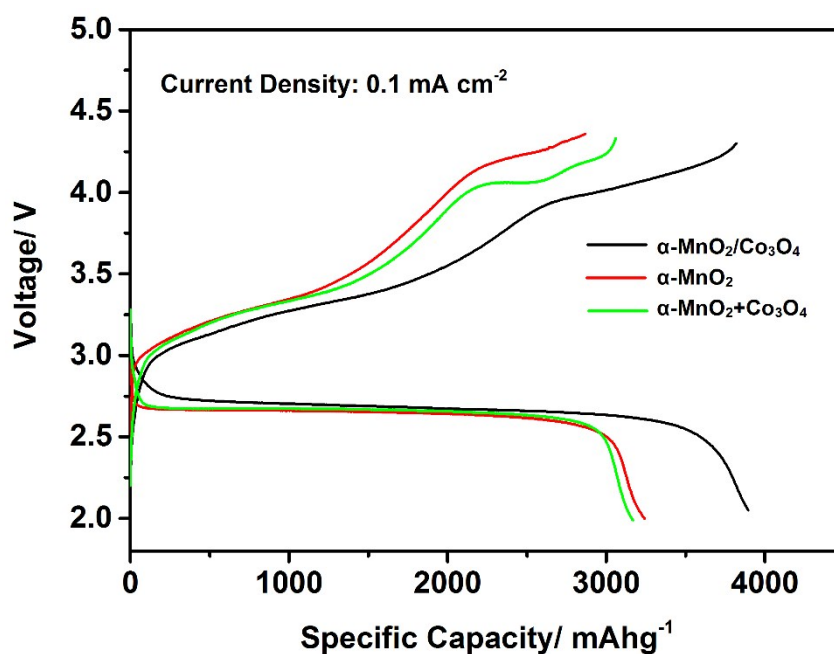

Fig. S1 Initial charge-discharge profiles of  $\alpha$ -MnO<sub>2</sub>/Co<sub>3</sub>O<sub>4</sub>,  $\alpha$ -MnO<sub>2</sub> and  $\alpha$ -MnO<sub>2</sub>/Co<sub>3</sub>O<sub>4</sub>.

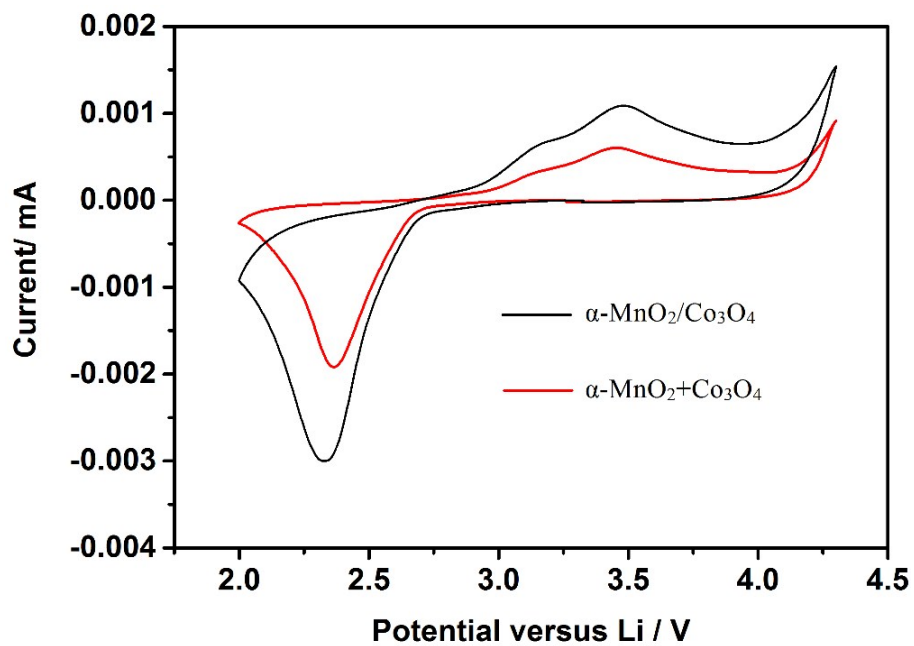

**Fig. S2** CV curves of  $\alpha\text{-MnO}_2/\text{Co}_3\text{O}_4$  and  $\alpha\text{-MnO}_2+\text{Co}_3\text{O}_4$  cathodes at a scan rate of  $0.2\text{ mV s}^{-1}$  between 2.0 and 4.3 V.

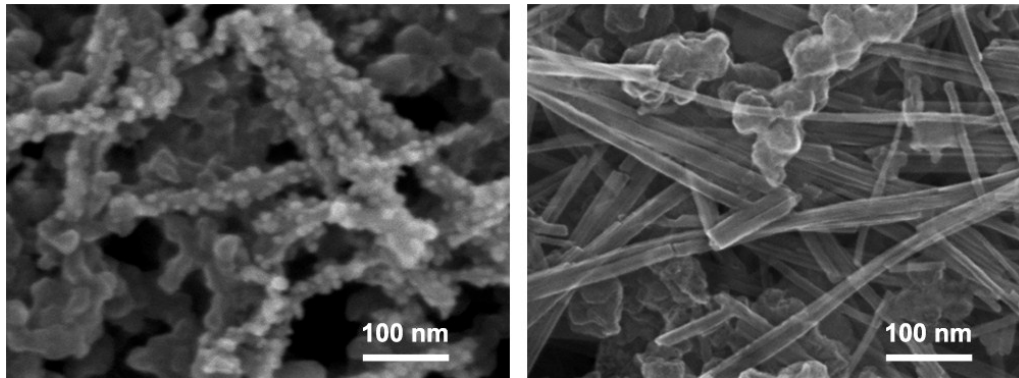

**Fig. S3** SEM images of  $\alpha\text{-MnO}_2/\text{Co}_3\text{O}_4$  (a) and  $\alpha\text{-MnO}_2+\text{Co}_3\text{O}_4$  (b) cathodes after discharge with a limited capacity of  $1000\text{ mAh}\cdot\text{g}^{-1}$ .
